# Supplementary material for: Comparative proteomic analysis of seminal plasma exosomes in buffalo with high and low sperm motility
Source: Springer Nature journal article supplement (doi:10.1186/s12864-022-09106-2), 2023-01-09
Supplement: MOESM1 [file 12864_2022_9106_MOESM1_ESM.pdf]

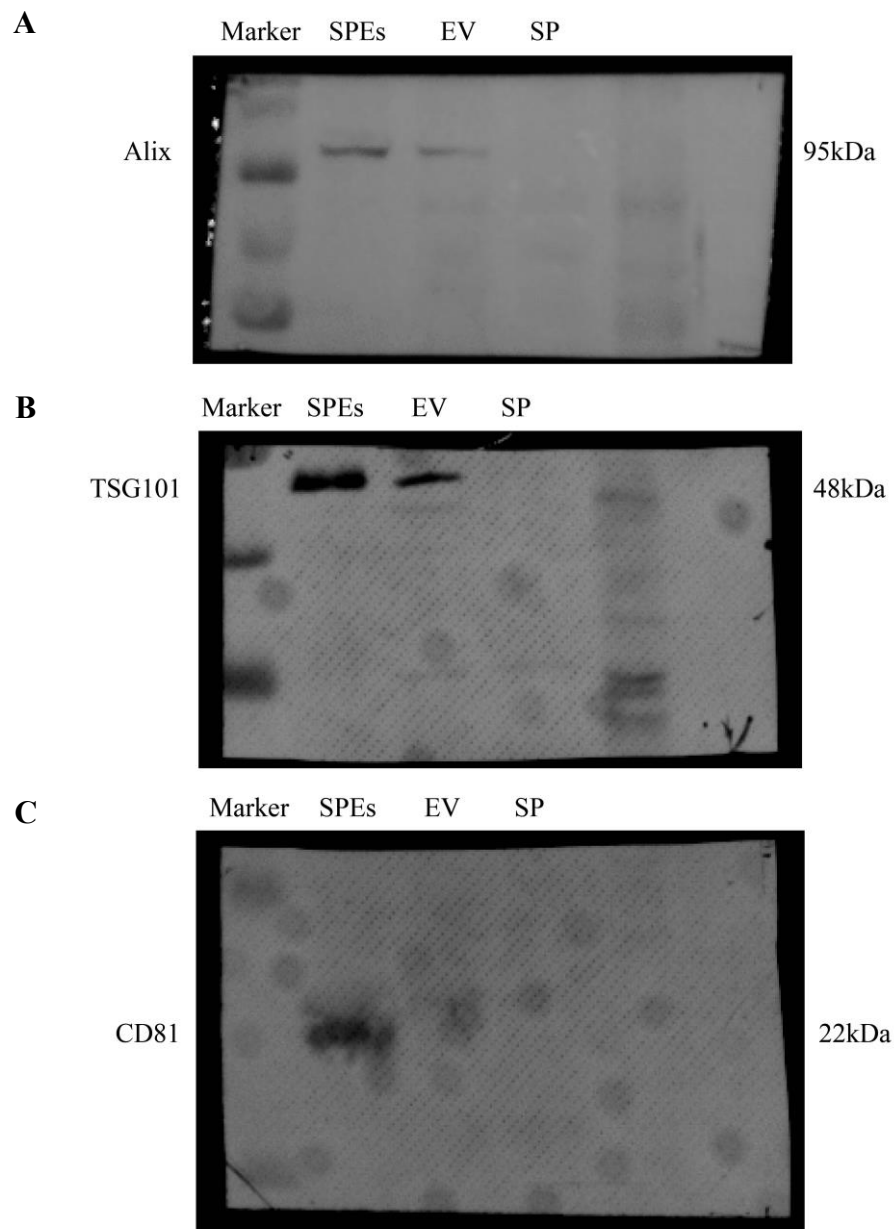

**Fig. S1.** The full size image of western blots of Alix, TSG101 and CD81 in seminal plasma exosomes (SPEs), large extracellular vesicles (LEVs), and seminal plasma (SP) samples. **A** Alix protein. **B** TSG101 protein. **C** CD81 protein

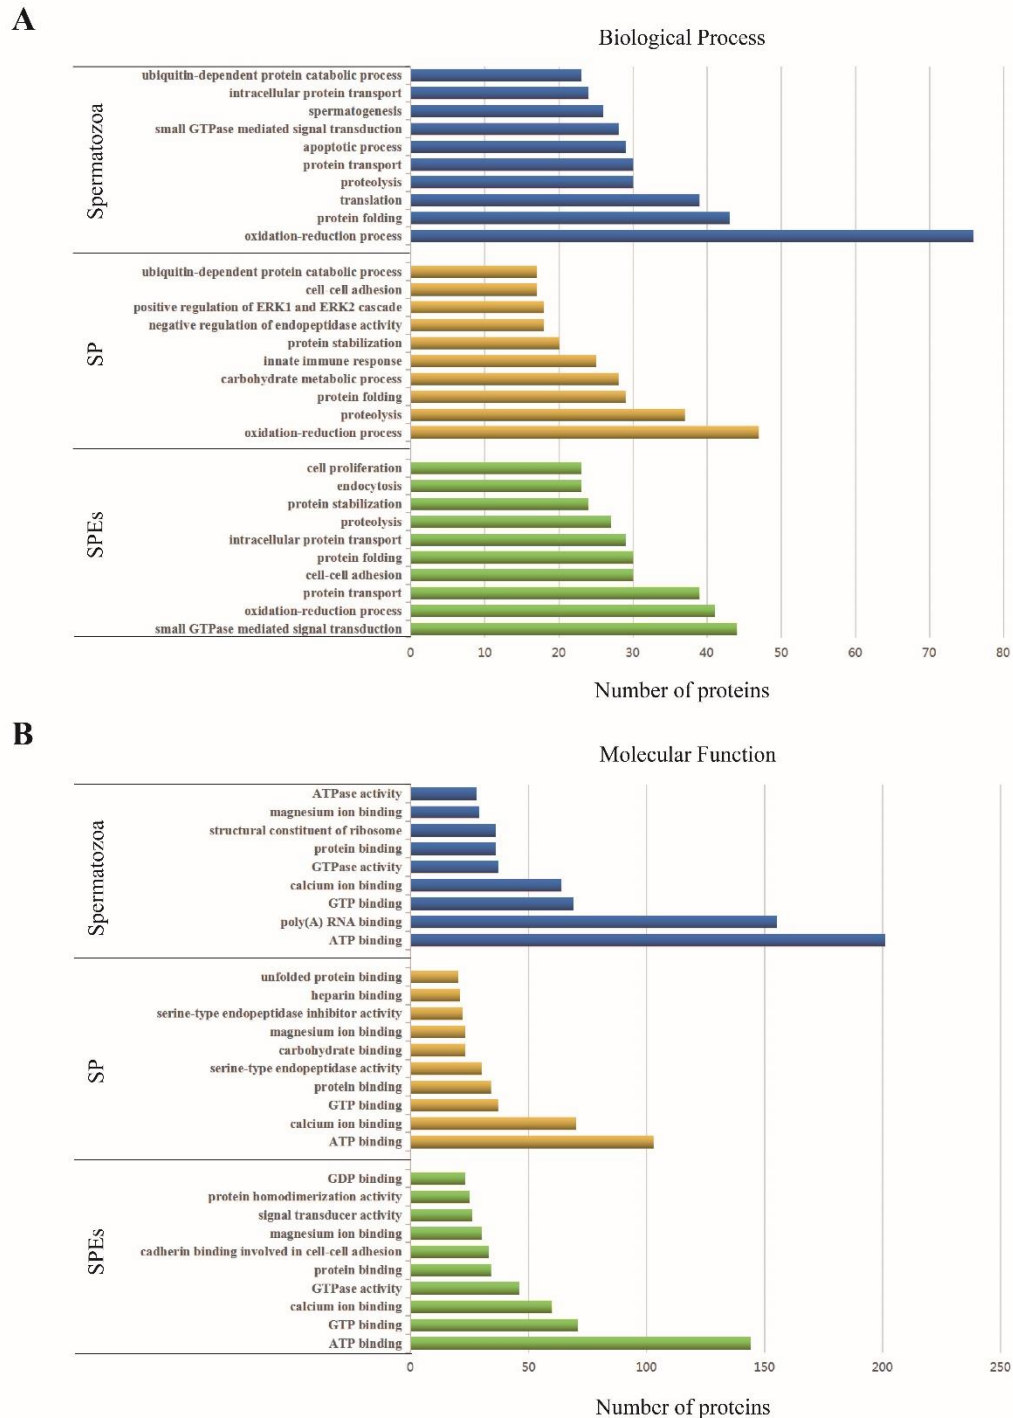

**Fig. S2.** Functional classification based on Gene Ontology (GO) annotation of proteome profile in spermatozoa, seminal plasma (SP), and seminal plasma exosomes (SPEs). **A** Functional classification of biological process. **B** Functional classification of molecular function

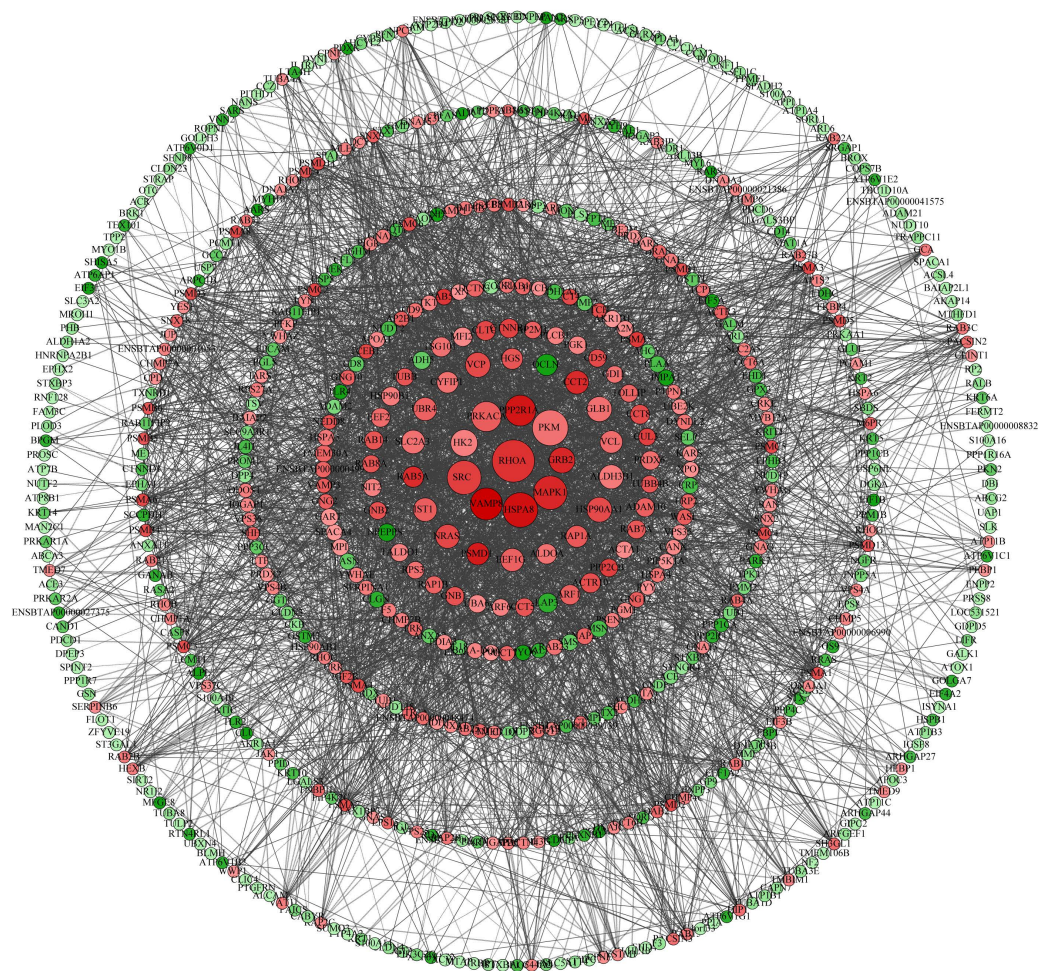

**Fig. S3.** Original image of protein-protein interaction (PPI) network of seminal plasma exosomes (SPEs)
